# Supplementary material for: Isomer dependent self-penetrated topologies and cluster subunits in copper phenylenediacetate coordination polymers with flexible dipyridyl ligands
Source: Royal Society of Chemistry journal article supplement (doi:10.1039/b926914b), 2010-01-01

## Electronic Supplementary Information

Isomer Dependent Self-Penetrated Topologies and Cluster Subunits in Copper Phenylenediacetate Coordination Polymers with Flexible Dipyridyl Ligands

Laura K. Sposato, Joseph A. Nettleman, Robert L. LaDuca\*

Fig. S1. TGA trace for **1**.

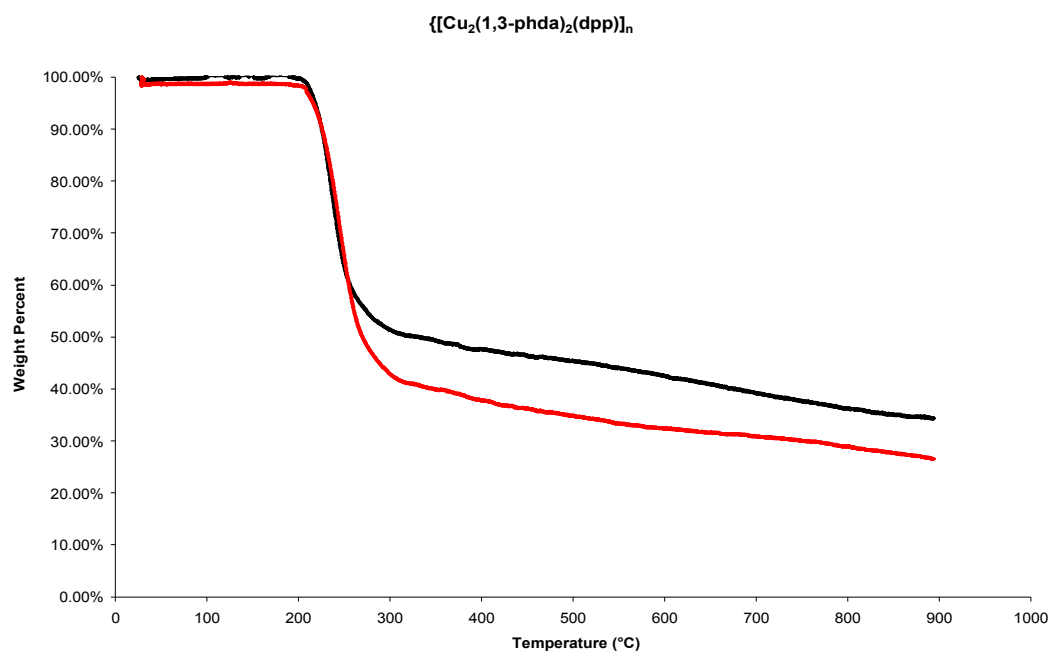

Fig. S2. TGA trace for **2**.

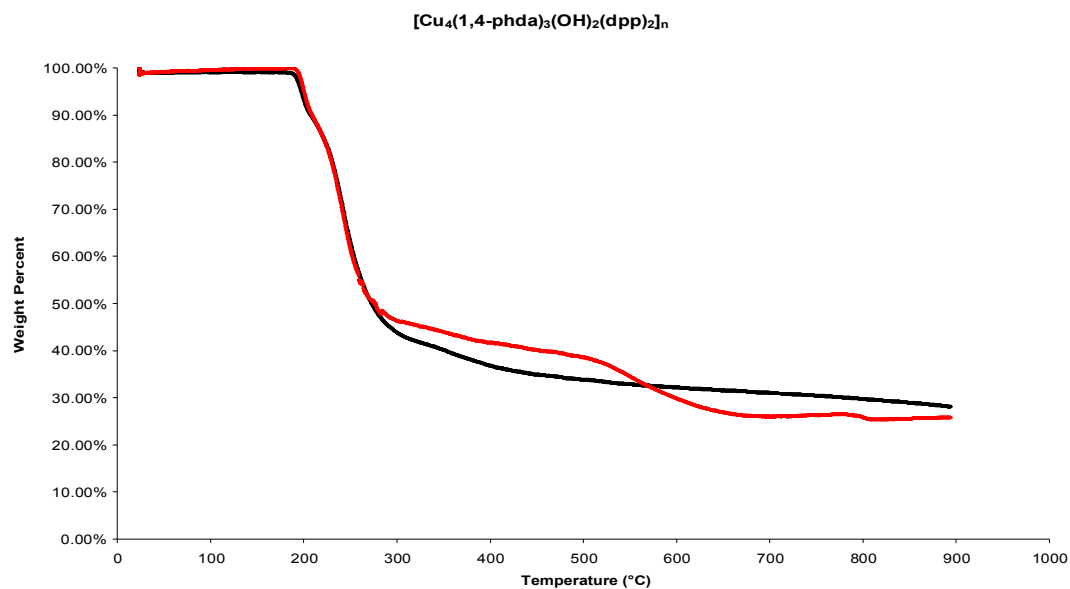

Supplement: b926914b.pdf [file b926914b.pdf]
